# Supplementary material for: Short elastin-like peptide-functionalized gold nanoparticles that are temperature responsive under near-physiological conditions
Source: Royal Society of Chemistry journal article supplement (doi:10.1039/c8tb01827h), 2018-01-01
Supplement: c8tb01827h1.pdf [file c8tb01827h1.pdf]

Supporting information for

**Short Elastin-like Peptide-functionalized Gold Nanoparticles that are  
Temperature Responsive under Near-Physiological Conditions**

Jingyi Zong,<sup>a</sup> Steven L. Cobb,<sup>a</sup> Neil R. Cameron<sup>b,c,\*</sup>

<sup>a</sup> Department of Chemistry, Durham University, Durham, DH1 3LE, U.K.

<sup>b</sup> Department of Materials Science and Engineering, Monash University, 22 Alliance

Lane, Clayton, Victoria 3800, Australia

<sup>c</sup> School of Engineering, University of Warwick, Coventry, CV4 7AL, U.K

*\*Email: [neil.cameron@monash.edu](mailto:neil.cameron@monash.edu)*

## Table of contents

|                                                 |   |
|-------------------------------------------------|---|
| Figure S1 (solid-phase peptide synthesis) ..... | 3 |
| Figure S2 (analytical HPLC of peptide 1) .....  | 3 |
| Figure S3 (analytical HPLC of peptide 2) .....  | 4 |
| Figure S4 (analytical HPLC of peptide 3) .....  | 4 |
| Figure S5 (structure of ELP-GNPs) .....         | 4 |
| Figure S6 (CD data of peptide 2) .....          | 5 |
| Figure S7 (CD data of peptide 3) .....          | 5 |

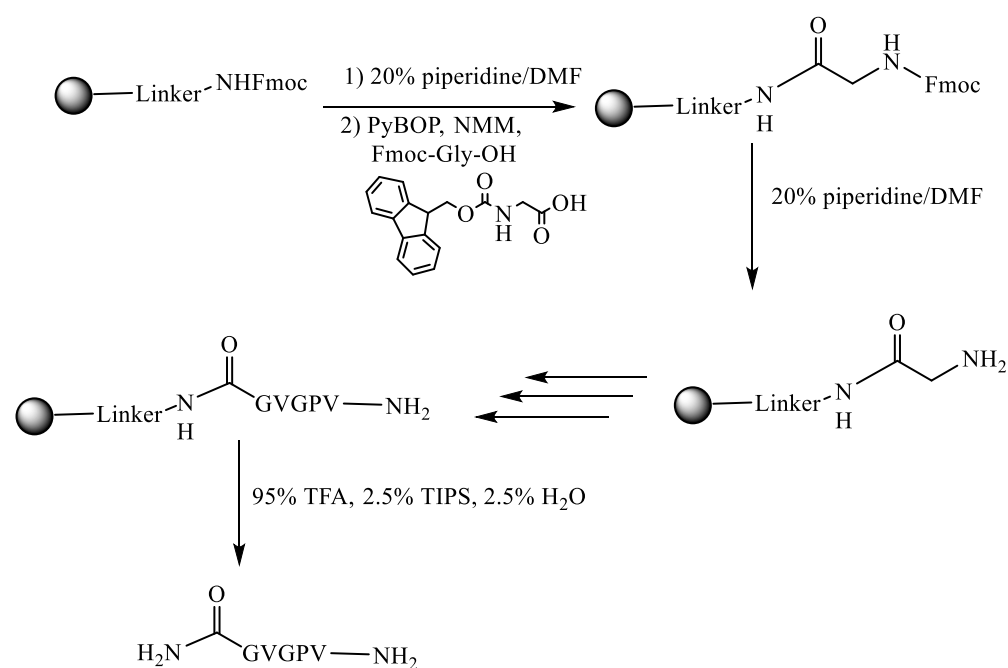

**Figure S1:** Solid peptide synthesis of **Peptide 1**.

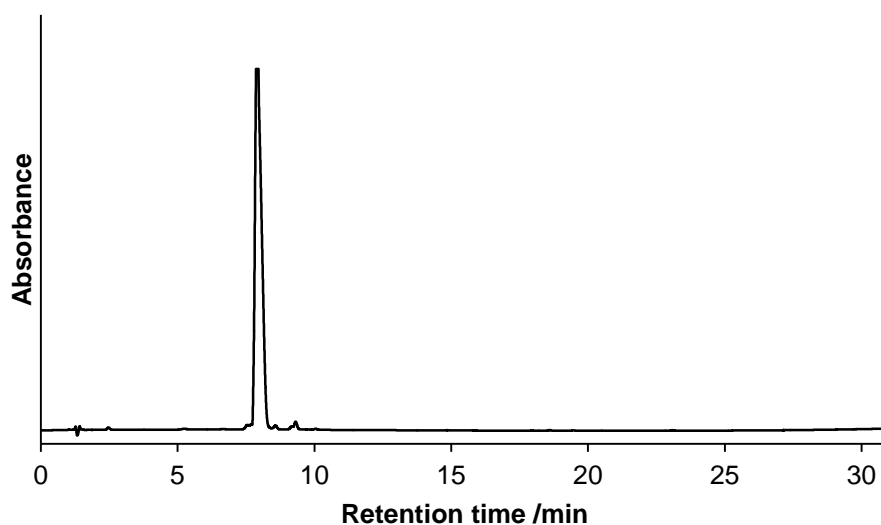

**Figure S2:** Analytical HPLC of **Peptide 1**. This pentapeptide was synthesized on a solid resin. HPLC was carried out on a preparative column (C18, 100 x 19 mm, 5  $\mu$ m particle size). Peptides were eluted in H<sub>2</sub>O / MeCN + 0.1 % trifluoroacetic acid.

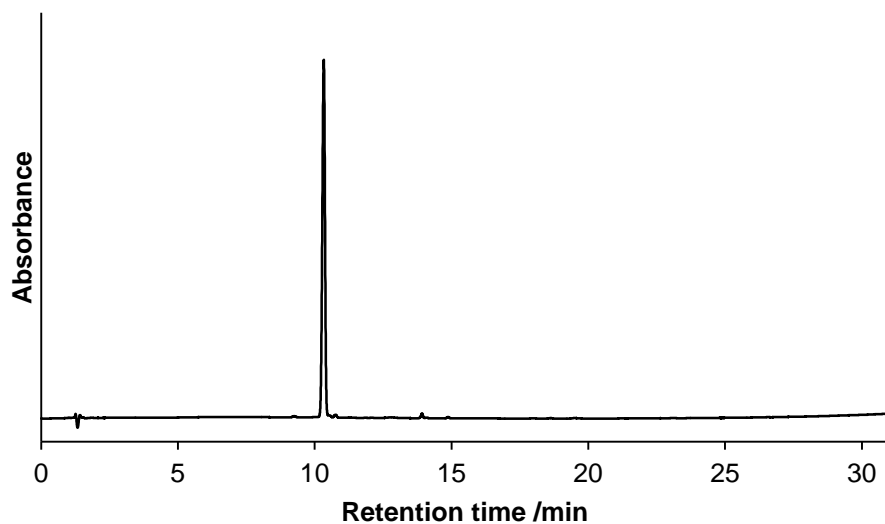

**Figure S3:** Analytical HPLC of **Peptide 2**. Same HPLC condition was carried as **Peptide 1**.

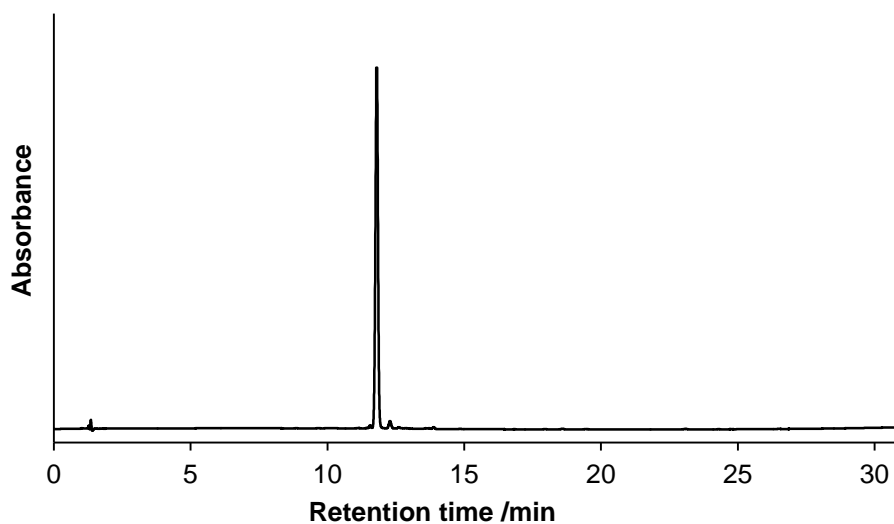

**Figure S4:** Analytical HPLC of **Peptide 3**. Same HPLC condition was carried as **Peptide 1**.

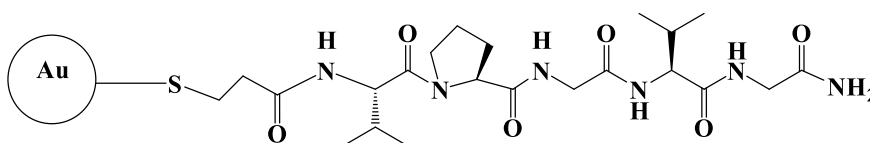

**Figure S5:** Structure of ELP-GNP.

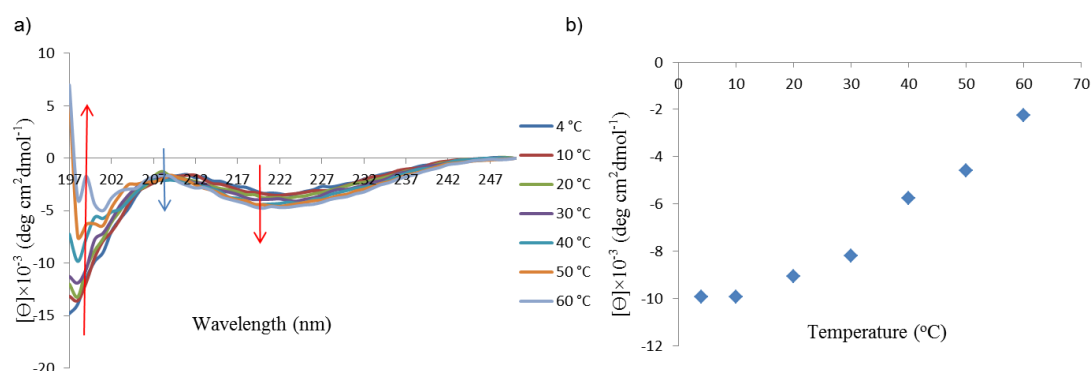

**Figure S6.** a) Temperature dependence of the circular dichroism (CD) spectra of peptide 2 (200  $\mu\text{M}$ ) in PBS buffer at pH 7.4 from 10  $^{\circ}\text{C}$  to 60  $^{\circ}\text{C}$ ; b) Temperature profile of  $[\Theta]_{198}$  values for **Peptide 2** (200  $\mu\text{M}$ ) in PBS buffer at pH 7.4 from 10  $^{\circ}\text{C}$  to 70  $^{\circ}\text{C}$ .

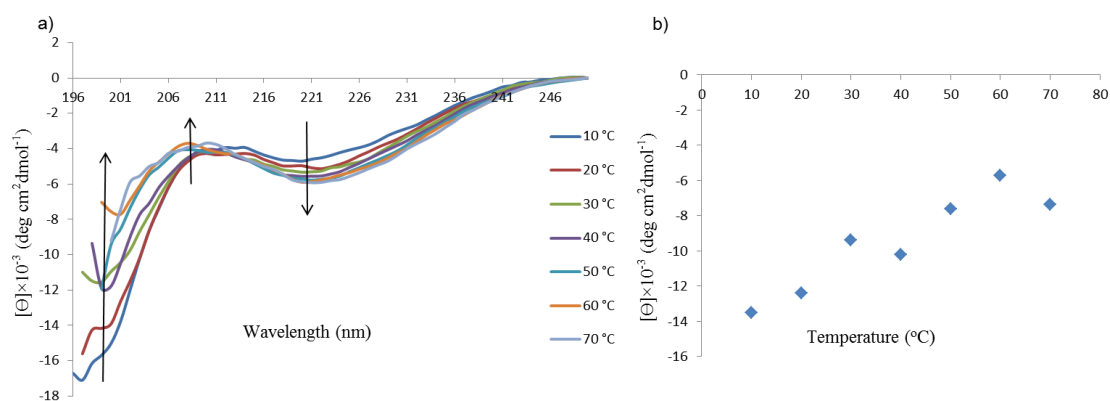

**Figure S7.** a) Temperature dependence of the circular dichroism (CD) spectra of peptide 3 (200  $\mu\text{M}$ ) in PBS buffer at pH 7.4 from 10  $^{\circ}\text{C}$  to 70  $^{\circ}\text{C}$ . b) Temperature profile of  $[\Theta]_{198}$  values for **Peptide 3** (200  $\mu\text{M}$ ) in PBS buffer at pH 7.4 from 10  $^{\circ}\text{C}$  to 70  $^{\circ}\text{C}$ .
